# Supplementary material for: Probing lattice vibration and surface electronic state in a layered (NH4)2V3O8 single crystal
Source: Royal Society of Chemistry journal article supplement (doi:10.1039/c7tc00336f), 2017-01-01
Supplement: c7tc00336f1.pdf [file c7tc00336f1.pdf]

## Electronic Supplementary Information

### Probing Lattice Vibration and Surface Electronic State in Layered (NH<sub>4</sub>)<sub>2</sub>V<sub>3</sub>O<sub>8</sub> Single Crystal

Haiping Chen,<sup>a</sup> Zhongti Sun,<sup>b</sup> Chengming Wang,<sup>c</sup> Xiuling Li,<sup>b</sup> Xusheng Zheng,<sup>a</sup> Youkui Zhang,<sup>a</sup> Qun He,<sup>a</sup>  
Xiaojun Wu,<sup>\*b</sup> and Li Song<sup>\*a</sup>

\* [song2012@ustc.edu.cn](mailto:song2012@ustc.edu.cn) (L. Song); [xjwu@ustc.edu.cn](mailto:xjwu@ustc.edu.cn) (X.J. Wu)

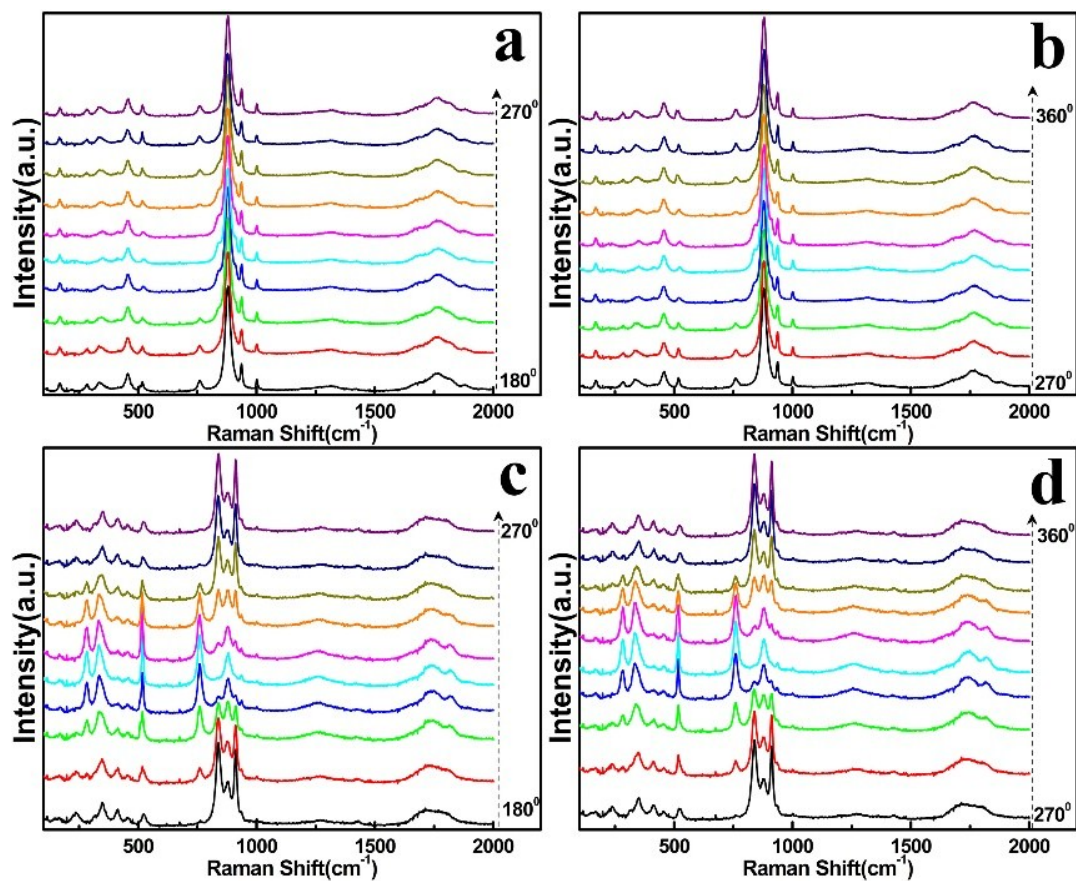

**Fig. S1.** The angle dependence of Raman peak intensity from 180° to 360°, (a) and (b) parallel polarization Z(XX)Z, (c) and (d) vertical polarization Z(ZX)Z.

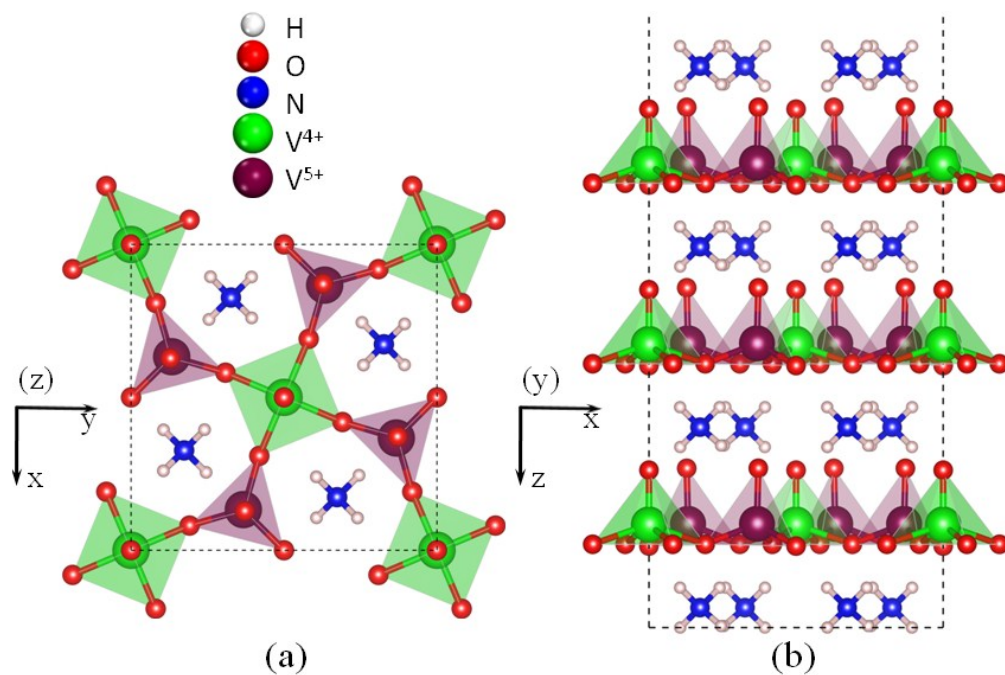

Fig. S2 (a) Viewed from *c* axis, (b) viewed from *b* axis.

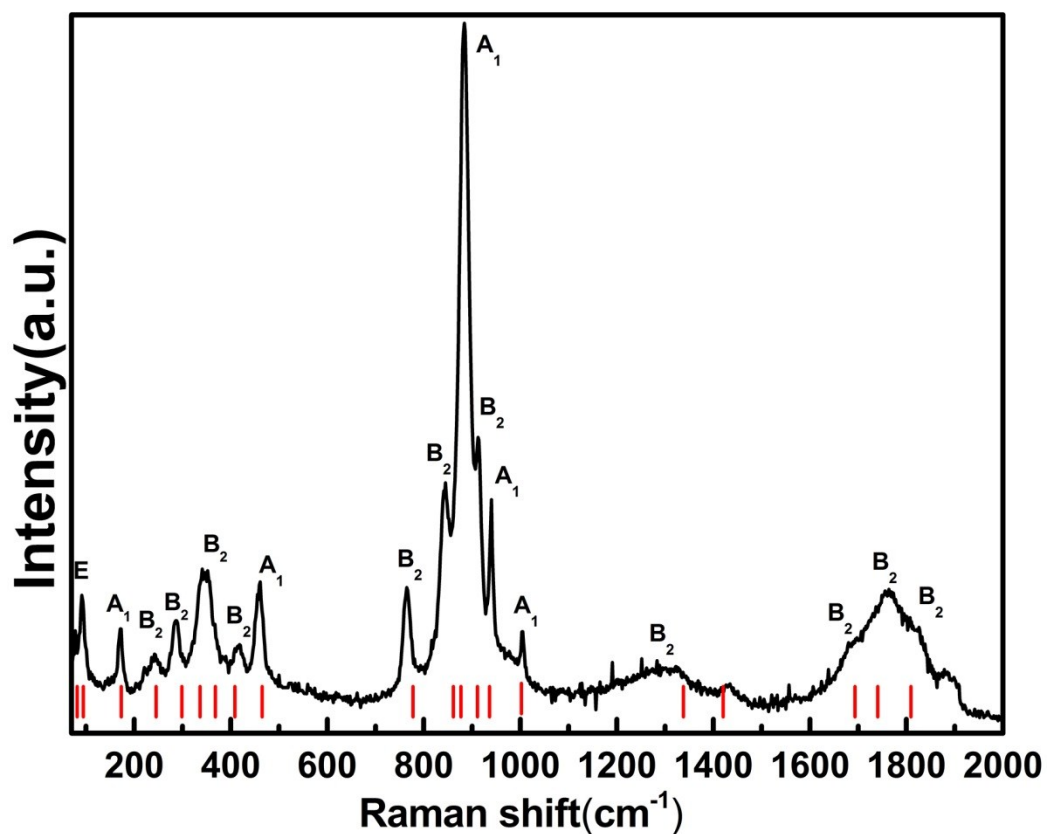

Fig. S3. The comparison of experimental Raman peaks with the calculated phonon frequency at  $\Gamma$  k-point (marked as red lines) for  $(\text{NH}_4)_2\text{V}_3\text{O}_8$ .

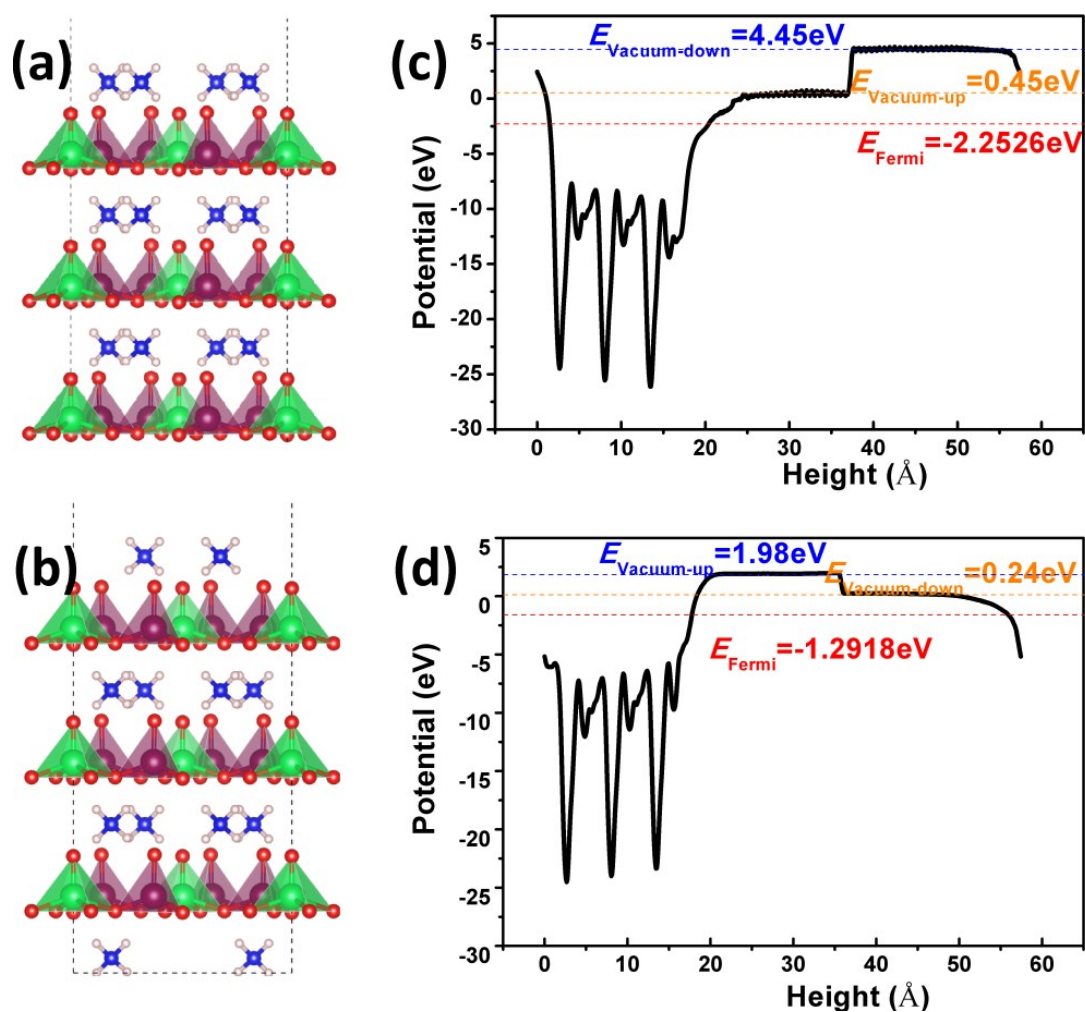

**Fig. S4.** The structures of (001) surface of  $(\text{NH}_4)_2\text{V}_3\text{O}_8$  with (a)  $\text{NH}_4^+$  ions and  $\text{V}_3\text{O}_8^{2-}$  surface, and (b)  $\text{NH}_4^+$  ions surface with with half number of  $\text{NH}_4^+$  ions removed. (c) and (d) are the corresponding potential profiles, (d) is the optimized potential.
